# Supplementary material
Source: publisher figshare collection journal article supplement (https://acs.figshare.com/ndownloader/files/8018992)
Supplement: Supplementary file 1 [file 8018992]

 
data_1 
 
_audit_creation_method            SHELXL-97 
_chemical_name_systematic 
; 
 ? 
; 
_chemical_name_common             ? 
_chemical_melting_point           ? 
_chemical_formula_moiety          ? 
_chemical_formula_sum 
 'C40 H34 Br2 N3 O' 
_chemical_formula_weight          732.52 
 
loop_ 
 _atom_type_symbol 
 _atom_type_description 
 _atom_type_scat_dispersion_real 
 _atom_type_scat_dispersion_imag 
 _atom_type_scat_source 
 'C'  'C'   0.0033   0.0016 
 'International Tables Vol C Tables 4.2.6.8 and 6.1.1.4' 
 'H'  'H'   0.0000   0.0000 
 'International Tables Vol C Tables 4.2.6.8 and 6.1.1.4' 
 'N'  'N'   0.0061   0.0033 
 'International Tables Vol C Tables 4.2.6.8 and 6.1.1.4' 
 'O'  'O'   0.0106   0.0060 
 'International Tables Vol C Tables 4.2.6.8 and 6.1.1.4' 
 'Br'  'Br'  -0.2901   2.4595 
 'International Tables Vol C Tables 4.2.6.8 and 6.1.1.4' 
 
_symmetry_cell_setting            triclinic 
_symmetry_space_group_name_H-M    P-1
 
loop_ 
 _symmetry_equiv_pos_as_xyz 
 'x, y, z' 
 '-x, -y, -z' 
 
_cell_length_a                    11.2235(2) 
_cell_length_b                    12.7822(3) 
_cell_length_c                    13.1058(3) 
_cell_angle_alpha                 62.5490(10) 
_cell_angle_beta                  83.9160(10) 
_cell_angle_gamma                 87.4370(10) 
_cell_volume                      1659.06(6) 
_cell_formula_units_Z             2 
_cell_measurement_temperature     296(2) 
_cell_measurement_reflns_used     5723 
_cell_measurement_theta_min       2.410
_cell_measurement_theta_max       24.617
 
_exptl_crystal_description        block
_exptl_crystal_colour             ? 
_exptl_crystal_size_max           ? 
_exptl_crystal_size_mid           ? 
_exptl_crystal_size_min           ? 
_exptl_crystal_density_meas       ? 
_exptl_crystal_density_diffrn     1.466 
_exptl_crystal_density_method     'not measured' 
_exptl_crystal_F_000              746 
_exptl_absorpt_coefficient_mu     2.480 
_exptl_absorpt_correction_type    ? 
_exptl_absorpt_correction_T_min   ? 
_exptl_absorpt_correction_T_max   ? 
_exptl_absorpt_process_details    ? 
 
_exptl_special_details 
; 
 ? 
; 
 
_diffrn_ambient_temperature       296(2) 
_diffrn_radiation_wavelength      0.71073 
_diffrn_radiation_type            MoK\a 
_diffrn_radiation_source          'fine-focus sealed tube' 
_diffrn_radiation_monochromator   graphite 
_diffrn_measurement_device_type   'CCD area detector' 
_diffrn_measurement_method        ? 
_diffrn_detector_area_resol_mean  ? 
_diffrn_standards_number          ? 
_diffrn_standards_interval_count  ? 
_diffrn_standards_interval_time   ? 
_diffrn_standards_decay_%         ? 
_diffrn_reflns_number             22697 
_diffrn_reflns_av_R_equivalents   0.0352 
_diffrn_reflns_av_sigmaI/netI     0.0325 
_diffrn_reflns_limit_h_min        -13 
_diffrn_reflns_limit_h_max        13 
_diffrn_reflns_limit_k_min        -13 
_diffrn_reflns_limit_k_max        15 
_diffrn_reflns_limit_l_min        -15 
_diffrn_reflns_limit_l_max        15 
_diffrn_reflns_theta_min          1.76 
_diffrn_reflns_theta_max          25.00 
_reflns_number_total              5857 
_reflns_number_gt                 4436 
_reflns_threshold_expression      >2sigma(I) 
 
_computing_data_collection        ? 
_computing_cell_refinement        ? 
_computing_data_reduction         ? 
_computing_structure_solution     'SHELXS-97 (Sheldrick, 1990)' 
_computing_structure_refinement   'SHELXL-97 (Sheldrick, 1997)' 
_computing_molecular_graphics     ? 
_computing_publication_material   ? 
 
_refine_special_details 
; 
 Refinement of F^2^ against ALL reflections.  The weighted R-factor wR and 
 goodness of fit S are based on F^2^, conventional R-factors R are based 
 on F, with F set to zero for negative F^2^. The threshold expression of 
 F^2^ > 2sigma(F^2^) is used only for calculating R-factors(gt) etc. and is 
 not relevant to the choice of reflections for refinement.  R-factors based 
 on F^2^ are statistically about twice as large as those based on F, and R- 
 factors based on ALL data will be even larger. 
; 
 
_refine_ls_structure_factor_coef  Fsqd  
_refine_ls_matrix_type            full 
_refine_ls_weighting_scheme       calc  
_refine_ls_weighting_details 
 'calc w=1/[\s^2^(Fo^2^)+(0.1000P)^2^+0.0000P] where P=(Fo^2^+2Fc^2^)/3' 
_atom_sites_solution_primary      direct 
_atom_sites_solution_secondary    difmap 
_atom_sites_solution_hydrogens    geom 
_refine_ls_hydrogen_treatment     mixed 
_refine_ls_extinction_method      none 
_refine_ls_extinction_coef        ? 
_refine_ls_number_reflns          5857 
_refine_ls_number_parameters      415 
_refine_ls_number_restraints      0 
_refine_ls_R_factor_all           0.0568 
_refine_ls_R_factor_gt            0.0391 
_refine_ls_wR_factor_ref          0.1311 
_refine_ls_wR_factor_gt           0.1211 
_refine_ls_goodness_of_fit_ref    0.930 
_refine_ls_restrained_S_all       0.930 
_refine_ls_shift/su_max           0.001 
_refine_ls_shift/su_mean          0.000 
 
loop_ 
 _atom_site_label 
 _atom_site_type_symbol 
 _atom_site_fract_x 
 _atom_site_fract_y 
 _atom_site_fract_z 
 _atom_site_U_iso_or_equiv 
 _atom_site_adp_type 
 _atom_site_occupancy 
 _atom_site_symmetry_multiplicity 
 _atom_site_calc_flag 
 _atom_site_refinement_flags 
 _atom_site_disorder_assembly 
 _atom_site_disorder_group 
Br1 Br 0.46117(4) 0.16704(3) 0.42184(3) 0.06832(16) Uani 1 1 d . . . 
Br2 Br -0.48252(3) 0.50963(3) -0.24203(3) 0.06458(16) Uani 1 1 d . . . 
C16 C -0.3973(3) 0.4136(3) -0.1133(3) 0.0426(7) Uani 1 1 d . . . 
N1 N -0.2164(2) 0.2436(2) 0.3664(2) 0.0423(6) Uani 1 1 d . . . 
C23 C 0.3133(3) 0.1515(3) 0.3709(3) 0.0423(7) Uani 1 1 d . . . 
C21 C 0.1650(3) 0.2327(3) 0.2378(3) 0.0432(7) Uani 1 1 d . . . 
H21A H 0.1399 0.2931 0.1701 0.052 Uiso 1 1 calc R . . 
C11 C -0.1042(3) 0.2341(2) 0.2025(2) 0.0371(6) Uani 1 1 d . . . 
H11A H -0.0560 0.2877 0.1319 0.045 Uiso 1 1 calc R . . 
N2 N -0.1467(2) 0.0879(2) 0.1468(2) 0.0507(7) Uani 1 1 d . . . 
H2A H -0.1739 0.0594 0.1059 0.061 Uiso 1 1 calc R . . 
C10 C -0.1518(2) 0.2988(2) 0.2692(2) 0.0364(6) Uani 1 1 d . . . 
C20 C 0.0912(3) 0.1344(2) 0.3027(2) 0.0361(6) Uani 1 1 d . . . 
C25 C 0.1354(3) 0.0425(3) 0.3992(3) 0.0426(7) Uani 1 1 d . . . 
H25A H 0.0896 -0.0256 0.4419 0.051 Uiso 1 1 calc R . . 
C26 C -0.0346(3) 0.0517(3) 0.2013(3) 0.0409(7) Uani 1 1 d . . . 
N3 N 0.1428(2) -0.0148(2) 0.1355(2) 0.0495(7) Uani 1 1 d . . . 
C13 C -0.2734(3) 0.2644(3) 0.0711(2) 0.0376(6) Uani 1 1 d . . . 
C19 C -0.0310(3) 0.1219(2) 0.2718(2) 0.0363(6) Uani 1 1 d . . . 
H19A H -0.0795 0.0765 0.3451 0.044 Uiso 1 1 calc R . . 
C33 C -0.0191(3) -0.0787(3) 0.2720(3) 0.0424(7) Uani 1 1 d . . . 
C18 C -0.2167(3) 0.3171(3) -0.0400(3) 0.0452(7) Uani 1 1 d . . . 
H18A H -0.1364 0.3010 -0.0526 0.054 Uiso 1 1 calc R . . 
C12 C -0.2070(3) 0.1798(3) 0.1714(3) 0.0409(7) Uani 1 1 d . . . 
H12A H -0.2647 0.1418 0.2396 0.049 Uiso 1 1 calc R . . 
O1 O 0.0953(3) 0.1807(2) 0.0275(2) 0.0653(7) Uani 1 1 d . . . 
C17 C -0.2772(3) 0.3927(3) -0.1321(3) 0.0454(7) Uani 1 1 d . . . 
H17A H -0.2378 0.4293 -0.2061 0.054 Uiso 1 1 calc R . . 
C5 C -0.2133(3) 0.4407(3) 0.3267(3) 0.0410(7) Uani 1 1 d . . . 
C15 C -0.4549(3) 0.3636(3) -0.0042(3) 0.0522(8) Uani 1 1 d . . . 
H15A H -0.5353 0.3798 0.0079 0.063 Uiso 1 1 calc R . . 
C7 C -0.1380(3) 0.4315(3) 0.2284(3) 0.0411(7) Uani 1 1 d . . . 
C6 C -0.2553(3) 0.3284(3) 0.4044(3) 0.0412(7) Uani 1 1 d . . . 
C24 C 0.2465(3) 0.0501(3) 0.4332(3) 0.0429(7) Uani 1 1 d . . . 
H24A H 0.2752 -0.0125 0.4972 0.052 Uiso 1 1 calc R . . 
C27 C 0.0736(3) 0.0839(3) 0.1095(3) 0.0480(8) Uani 1 1 d . . . 
C22 C 0.2739(3) 0.2423(3) 0.2718(3) 0.0468(8) Uani 1 1 d . . . 
H22A H 0.3209 0.3094 0.2285 0.056 Uiso 1 1 calc R . . 
C32 C -0.0886(3) -0.1604(3) 0.3653(3) 0.0498(8) Uani 1 1 d . . . 
H32A H -0.1597 -0.1379 0.3928 0.060 Uiso 1 1 calc R . . 
C14 C -0.3931(3) 0.2890(3) 0.0879(3) 0.0462(7) Uani 1 1 d . . . 
H14A H -0.4323 0.2549 0.1621 0.055 Uiso 1 1 calc R . . 
C31 C -0.0512(4) -0.2773(3) 0.4183(3) 0.0599(9) Uani 1 1 d . . . 
H31A H -0.0978 -0.3333 0.4813 0.072 Uiso 1 1 calc R . . 
C28 C 0.0871(3) -0.1131(3) 0.2315(3) 0.0455(7) Uani 1 1 d . . . 
C29 C 0.1250(4) -0.2278(3) 0.2828(3) 0.0590(9) Uani 1 1 d . . . 
H29A H 0.1959 -0.2505 0.2550 0.071 Uiso 1 1 calc R . . 
C35 C 0.3619(3) -0.0541(3) 0.1279(3) 0.0518(8) Uani 1 1 d . . . 
C4 C -0.2424(3) 0.5348(3) 0.3486(3) 0.0546(8) Uani 1 1 d . . . 
H4A H -0.2143 0.6101 0.2971 0.066 Uiso 1 1 calc R . . 
C30 C 0.0537(4) -0.3099(3) 0.3781(4) 0.0665(10) Uani 1 1 d . . . 
H30A H 0.0781 -0.3880 0.4148 0.080 Uiso 1 1 calc R . . 
C9 C -0.1858(4) 0.5071(3) 0.1107(3) 0.0611(10) Uani 1 1 d . . . 
H9A H -0.2670 0.4845 0.1134 0.092 Uiso 1 1 calc R . . 
H9B H -0.1370 0.4953 0.0521 0.092 Uiso 1 1 calc R . . 
H9C H -0.1833 0.5887 0.0930 0.092 Uiso 1 1 calc R . . 
C1 C -0.3268(3) 0.3084(3) 0.5042(3) 0.0549(9) Uani 1 1 d . . . 
H1B H -0.3541 0.2329 0.5562 0.066 Uiso 1 1 calc R . . 
C8 C -0.0080(3) 0.4666(3) 0.2255(4) 0.0630(10) Uani 1 1 d . . . 
H8A H 0.0212 0.4186 0.2994 0.095 Uiso 1 1 calc R . . 
H8B H -0.0051 0.5480 0.2084 0.095 Uiso 1 1 calc R . . 
H8C H 0.0412 0.4550 0.1670 0.095 Uiso 1 1 calc R . . 
C2 C -0.3566(3) 0.4032(4) 0.5246(3) 0.0635(10) Uani 1 1 d . . . 
H2B H -0.4060 0.3916 0.5906 0.076 Uiso 1 1 calc R . . 
C34 C 0.2502(3) -0.0201(4) 0.0657(3) 0.0619(10) Uani 1 1 d . . . 
H34A H 0.2630 0.0565 -0.0011 0.074 Uiso 1 1 calc R . . 
H34B H 0.2370 -0.0766 0.0378 0.074 Uiso 1 1 calc R . . 
C3 C -0.3145(3) 0.5155(4) 0.4486(4) 0.0628(10) Uani 1 1 d . . . 
H3A H -0.3345 0.5781 0.4647 0.075 Uiso 1 1 calc R . . 
C36 C 0.3918(4) -0.0018(3) 0.1938(3) 0.0634(10) Uani 1 1 d . . . 
H36A H 0.3415 0.0551 0.2003 0.076 Uiso 1 1 calc R . . 
C40 C 0.4372(4) -0.1395(3) 0.1199(4) 0.0678(11) Uani 1 1 d . . . 
H40A H 0.4183 -0.1765 0.0769 0.081 Uiso 1 1 calc R . . 
C37 C 0.4942(4) -0.0323(4) 0.2496(4) 0.0772(12) Uani 1 1 d . . . 
H37A H 0.5138 0.0044 0.2925 0.093 Uiso 1 1 calc R . . 
C39 C 0.5393(4) -0.1694(4) 0.1753(5) 0.0843(14) Uani 1 1 d . . . 
H39A H 0.5904 -0.2254 0.1680 0.101 Uiso 1 1 calc R . . 
C38 C 0.5679(4) -0.1185(4) 0.2413(4) 0.0811(13) Uani 1 1 d . . . 
H38A H 0.6365 -0.1415 0.2804 0.097 Uiso 1 1 calc R . . 
 
loop_ 
 _atom_site_aniso_label 
 _atom_site_aniso_U_11 
 _atom_site_aniso_U_22 
 _atom_site_aniso_U_33 
 _atom_site_aniso_U_23 
 _atom_site_aniso_U_13 
 _atom_site_aniso_U_12 
Br1 0.0624(3) 0.0580(3) 0.0733(3) -0.0136(2) -0.0370(2) -0.00692(18) 
Br2 0.0697(3) 0.0584(3) 0.0642(3) -0.0229(2) -0.0337(2) 0.01848(19) 
C16 0.0488(18) 0.0372(16) 0.0474(18) -0.0222(14) -0.0176(15) 0.0070(14) 
N1 0.0456(14) 0.0388(14) 0.0393(14) -0.0143(12) -0.0059(12) -0.0074(11) 
C23 0.0414(16) 0.0438(17) 0.0437(17) -0.0200(15) -0.0133(14) 0.0013(13) 
C21 0.0475(17) 0.0365(16) 0.0398(16) -0.0107(14) -0.0144(14) 0.0028(13) 
C11 0.0390(15) 0.0334(15) 0.0362(15) -0.0125(13) -0.0092(12) 0.0005(12) 
N2 0.0612(17) 0.0464(16) 0.0572(17) -0.0299(14) -0.0331(14) 0.0113(13) 
C10 0.0339(14) 0.0364(15) 0.0379(16) -0.0149(13) -0.0107(13) 0.0007(12) 
C20 0.0425(16) 0.0332(15) 0.0333(15) -0.0150(13) -0.0095(12) 0.0037(12) 
C25 0.0484(17) 0.0371(16) 0.0369(16) -0.0114(13) -0.0073(14) -0.0046(13) 
C26 0.0503(18) 0.0337(16) 0.0393(16) -0.0156(14) -0.0130(14) 0.0028(13) 
N3 0.0591(17) 0.0493(16) 0.0410(14) -0.0218(13) -0.0028(13) 0.0011(13) 
C13 0.0390(16) 0.0364(15) 0.0378(16) -0.0160(13) -0.0091(13) -0.0034(12) 
C19 0.0411(15) 0.0325(15) 0.0350(15) -0.0140(13) -0.0085(13) -0.0011(12) 
C33 0.0465(17) 0.0398(17) 0.0442(17) -0.0198(14) -0.0153(14) -0.0010(13) 
C18 0.0360(16) 0.0521(19) 0.0489(18) -0.0237(16) -0.0070(14) -0.0004(14) 
C12 0.0428(16) 0.0383(16) 0.0400(16) -0.0147(13) -0.0112(13) -0.0017(13) 
O1 0.0919(19) 0.0462(14) 0.0449(14) -0.0108(12) -0.0003(13) -0.0043(13) 
C17 0.0470(18) 0.0436(18) 0.0405(17) -0.0147(14) -0.0043(14) -0.0036(14) 
C5 0.0365(15) 0.0437(17) 0.0455(17) -0.0219(15) -0.0075(13) -0.0001(13) 
C15 0.0418(18) 0.057(2) 0.062(2) -0.0310(18) -0.0090(16) 0.0147(15) 
C7 0.0410(16) 0.0347(15) 0.0451(17) -0.0167(14) -0.0009(13) -0.0023(13) 
C6 0.0346(15) 0.0495(18) 0.0419(17) -0.0216(15) -0.0095(13) -0.0017(13) 
C24 0.0480(18) 0.0410(17) 0.0342(16) -0.0111(13) -0.0111(14) 0.0004(14) 
C27 0.065(2) 0.0425(18) 0.0394(17) -0.0194(16) -0.0133(15) -0.0004(16) 
C22 0.0493(18) 0.0360(16) 0.0460(18) -0.0093(14) -0.0100(15) -0.0076(14) 
C32 0.0489(18) 0.0426(18) 0.057(2) -0.0206(16) -0.0100(16) -0.0074(15) 
C14 0.0434(18) 0.0529(19) 0.0419(17) -0.0217(15) -0.0033(14) 0.0013(14) 
C31 0.068(2) 0.043(2) 0.060(2) -0.0142(17) -0.0107(19) -0.0108(17) 
C28 0.0563(19) 0.0410(17) 0.0472(18) -0.0256(15) -0.0137(15) 0.0024(15) 
C29 0.068(2) 0.049(2) 0.066(2) -0.0308(19) -0.0142(19) 0.0101(17) 
C35 0.057(2) 0.051(2) 0.0478(19) -0.0253(16) 0.0081(16) -0.0060(16) 
C4 0.0497(19) 0.053(2) 0.069(2) -0.0336(18) -0.0103(17) 0.0030(16) 
C30 0.082(3) 0.0366(19) 0.078(3) -0.0206(19) -0.022(2) 0.0037(18) 
C9 0.088(3) 0.0398(19) 0.0456(19) -0.0122(16) -0.0044(19) 0.0079(18) 
C1 0.0482(19) 0.070(2) 0.0456(19) -0.0253(18) 0.0013(16) -0.0126(17) 
C8 0.049(2) 0.059(2) 0.088(3) -0.041(2) 0.0116(19) -0.0174(17) 
C2 0.047(2) 0.097(3) 0.060(2) -0.047(2) -0.0028(17) 0.000(2) 
C34 0.074(2) 0.067(2) 0.053(2) -0.0358(19) 0.0029(19) 0.0025(19) 
C3 0.052(2) 0.078(3) 0.082(3) -0.058(2) -0.008(2) 0.0110(19) 
C36 0.078(3) 0.060(2) 0.058(2) -0.0322(19) -0.004(2) 0.0006(19) 
C40 0.063(2) 0.057(2) 0.089(3) -0.043(2) 0.015(2) -0.0075(19) 
C37 0.079(3) 0.084(3) 0.066(3) -0.033(2) -0.001(2) -0.017(2) 
C39 0.064(3) 0.064(3) 0.118(4) -0.040(3) 0.012(3) -0.004(2) 
C38 0.054(2) 0.076(3) 0.084(3) -0.013(3) 0.000(2) -0.011(2) 
 
_geom_special_details 
; 
 All esds (except the esd in the dihedral angle between two l.s. planes) 
 are estimated using the full covariance matrix.  The cell esds are taken 
 into account individually in the estimation of esds in distances, angles 
 and torsion angles; correlations between esds in cell parameters are only 
 used when they are defined by crystal symmetry.  An approximate (isotropic) 
 treatment of cell esds is used for estimating esds involving l.s. planes. 
; 
 
loop_ 
 _geom_bond_atom_site_label_1 
 _geom_bond_atom_site_label_2 
 _geom_bond_distance 
 _geom_bond_site_symmetry_2 
 _geom_bond_publ_flag 
Br1 C23 1.905(3) . ? 
Br2 C16 1.897(3) . ? 
C16 C15 1.368(4) . ? 
C16 C17 1.380(4) . ? 
N1 C10 1.292(4) . ? 
N1 C6 1.423(4) . ? 
C23 C24 1.374(4) . ? 
C23 C22 1.384(4) . ? 
C21 C22 1.373(4) . ? 
C21 C20 1.395(4) . ? 
C11 C10 1.504(4) . ? 
C11 C19 1.552(4) . ? 
C11 C12 1.553(4) . ? 
N2 C26 1.463(4) . ? 
N2 C12 1.474(4) . ? 
C10 C7 1.534(4) . ? 
C20 C25 1.392(4) . ? 
C20 C19 1.506(4) . ? 
C25 C24 1.389(4) . ? 
C26 C33 1.500(4) . ? 
C26 C27 1.540(5) . ? 
C26 C19 1.560(4) . ? 
N3 C27 1.372(4) . ? 
N3 C28 1.414(4) . ? 
N3 C34 1.452(4) . ? 
C13 C14 1.383(4) . ? 
C13 C18 1.385(4) . ? 
C13 C12 1.508(4) . ? 
C33 C32 1.374(4) . ? 
C33 C28 1.390(5) . ? 
C18 C17 1.375(4) . ? 
O1 C27 1.221(4) . ? 
C5 C4 1.377(4) . ? 
C5 C6 1.390(4) . ? 
C5 C7 1.513(4) . ? 
C15 C14 1.380(4) . ? 
C7 C9 1.535(5) . ? 
C7 C8 1.537(4) . ? 
C6 C1 1.381(4) . ? 
C32 C31 1.392(5) . ? 
C31 C30 1.365(6) . ? 
C28 C29 1.371(5) . ? 
C29 C30 1.399(6) . ? 
C35 C36 1.386(5) . ? 
C35 C40 1.387(5) . ? 
C35 C34 1.506(5) . ? 
C4 C3 1.389(5) . ? 
C1 C2 1.376(5) . ? 
C2 C3 1.385(6) . ? 
C36 C37 1.372(6) . ? 
C40 C39 1.367(6) . ? 
C37 C38 1.386(6) . ? 
C39 C38 1.368(7) . ? 
 
loop_ 
 _geom_angle_atom_site_label_1 
 _geom_angle_atom_site_label_2 
 _geom_angle_atom_site_label_3 
 _geom_angle 
 _geom_angle_site_symmetry_1 
 _geom_angle_site_symmetry_3 
 _geom_angle_publ_flag 
C15 C16 C17 120.8(3) . . ? 
C15 C16 Br2 120.3(2) . . ? 
C17 C16 Br2 118.9(2) . . ? 
C10 N1 C6 107.1(2) . . ? 
C24 C23 C22 120.6(3) . . ? 
C24 C23 Br1 119.6(2) . . ? 
C22 C23 Br1 119.8(2) . . ? 
C22 C21 C20 121.4(3) . . ? 
C10 C11 C19 114.7(2) . . ? 
C10 C11 C12 111.6(2) . . ? 
C19 C11 C12 100.6(2) . . ? 
C26 N2 C12 111.1(2) . . ? 
N1 C10 C11 119.9(3) . . ? 
N1 C10 C7 114.4(3) . . ? 
C11 C10 C7 125.5(2) . . ? 
C25 C20 C21 117.5(3) . . ? 
C25 C20 C19 119.0(3) . . ? 
C21 C20 C19 123.5(2) . . ? 
C24 C25 C20 121.5(3) . . ? 
N2 C26 C33 115.5(2) . . ? 
N2 C26 C27 110.8(2) . . ? 
C33 C26 C27 102.0(3) . . ? 
N2 C26 C19 104.4(2) . . ? 
C33 C26 C19 113.5(2) . . ? 
C27 C26 C19 110.8(2) . . ? 
C27 N3 C28 110.3(3) . . ? 
C27 N3 C34 124.5(3) . . ? 
C28 N3 C34 124.8(3) . . ? 
C14 C13 C18 118.5(3) . . ? 
C14 C13 C12 120.7(3) . . ? 
C18 C13 C12 120.7(3) . . ? 
C20 C19 C11 119.4(2) . . ? 
C20 C19 C26 115.2(2) . . ? 
C11 C19 C26 102.8(2) . . ? 
C32 C33 C28 120.0(3) . . ? 
C32 C33 C26 130.9(3) . . ? 
C28 C33 C26 109.1(3) . . ? 
C17 C18 C13 121.1(3) . . ? 
N2 C12 C13 111.1(2) . . ? 
N2 C12 C11 103.6(2) . . ? 
C13 C12 C11 115.9(2) . . ? 
C18 C17 C16 119.2(3) . . ? 
C4 C5 C6 120.1(3) . . ? 
C4 C5 C7 132.2(3) . . ? 
C6 C5 C7 107.7(3) . . ? 
C16 C15 C14 119.6(3) . . ? 
C5 C7 C10 99.0(2) . . ? 
C5 C7 C9 112.9(3) . . ? 
C10 C7 C9 112.7(3) . . ? 
C5 C7 C8 109.3(3) . . ? 
C10 C7 C8 112.4(3) . . ? 
C9 C7 C8 110.1(3) . . ? 
C1 C6 C5 121.3(3) . . ? 
C1 C6 N1 127.0(3) . . ? 
C5 C6 N1 111.7(2) . . ? 
C23 C24 C25 119.1(3) . . ? 
O1 C27 N3 125.3(3) . . ? 
O1 C27 C26 126.3(3) . . ? 
N3 C27 C26 108.4(3) . . ? 
C21 C22 C23 119.7(3) . . ? 
C33 C32 C31 119.3(3) . . ? 
C15 C14 C13 120.8(3) . . ? 
C30 C31 C32 120.2(3) . . ? 
C29 C28 C33 121.3(3) . . ? 
C29 C28 N3 128.7(3) . . ? 
C33 C28 N3 109.9(3) . . ? 
C28 C29 C30 118.0(3) . . ? 
C36 C35 C40 118.7(4) . . ? 
C36 C35 C34 121.4(3) . . ? 
C40 C35 C34 119.9(3) . . ? 
C5 C4 C3 119.0(3) . . ? 
C31 C30 C29 121.2(3) . . ? 
C2 C1 C6 118.2(3) . . ? 
C1 C2 C3 121.2(3) . . ? 
N3 C34 C35 114.5(3) . . ? 
C2 C3 C4 120.2(3) . . ? 
C37 C36 C35 121.3(4) . . ? 
C39 C40 C35 119.8(4) . . ? 
C36 C37 C38 119.3(4) . . ? 
C40 C39 C38 121.3(4) . . ? 
C39 C38 C37 119.6(4) . . ? 
 
_diffrn_measured_fraction_theta_max    1.000 
_diffrn_reflns_theta_full              25.00 
_diffrn_measured_fraction_theta_full   1.000 
_refine_diff_density_max    0.764 
_refine_diff_density_min   -0.635 
_refine_diff_density_rms    0.054 
